# Supplementary material for: Non-homeostatic body weight regulation through a brainstem-restricted receptor for GDF15
Source: Springer Nature journal article supplement (doi:10.1038/nature24042), 2017-09-26

Ext Data Fig 4a

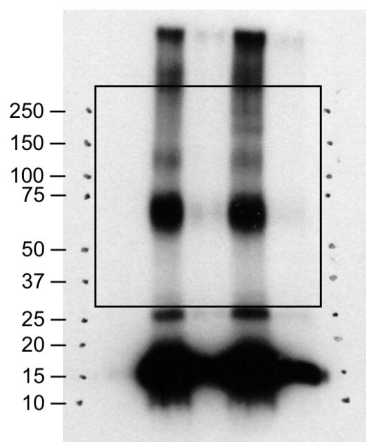

Ext Data Fig 4b upper panel

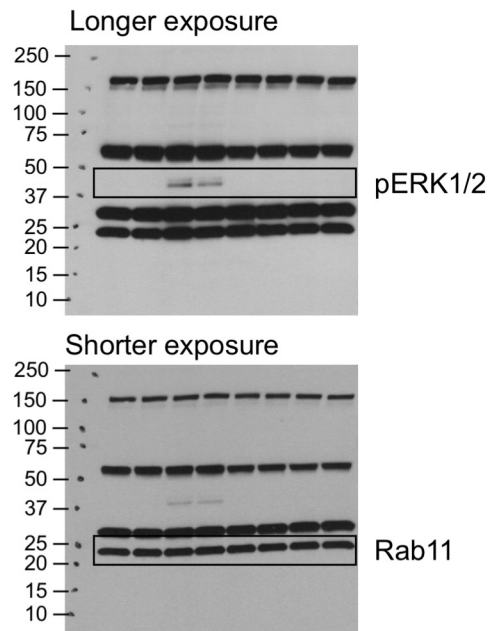

Ext Data Fig 4b lower panel

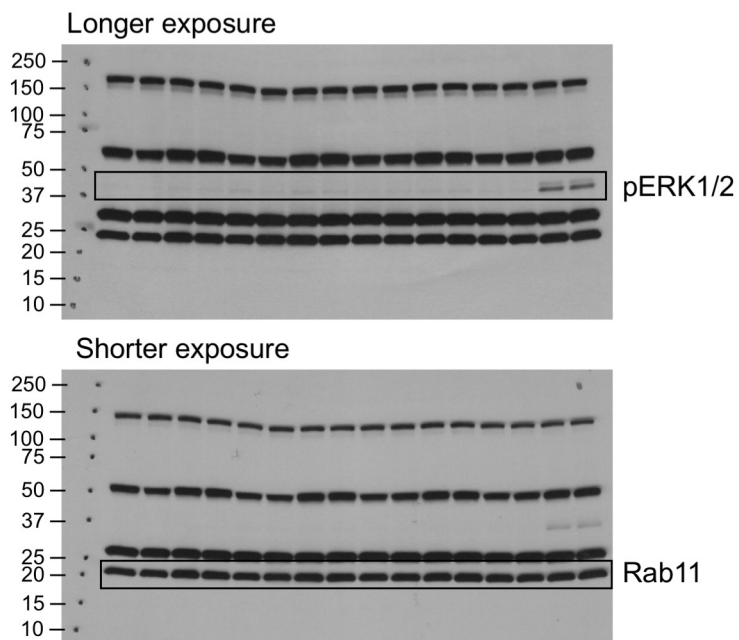

Supplement: 41586_2017_BFnature24042_MOESM1_ESM.pdf [file 41586_2017_BFnature24042_MOESM1_ESM.pdf]
